# Supplementary material for: Evaluation of Dynamic Changes of Volatile Organic Components for Fishmeal during Storage by HS-SPME-GC-MS with PLS-DA
Source: MDPI journal article supplement (doi:10.3390/foods13091290), 2024-04-23
Supplement: s1 [file s1]

Table S1 The species and relative content of VOCs during storage

| Domestic fishmeal |                 |                          |            |           |            |            |           |            |            |            |            |            |            |            |           |            |             |
|-------------------|-----------------|--------------------------|------------|-----------|------------|------------|-----------|------------|------------|------------|------------|------------|------------|------------|-----------|------------|-------------|
| CAS               | Compound<br>CID | Relative content (µg/kg) |            |           |            |            |           |            |            |            |            |            |            |            |           |            |             |
|                   |                 | 0d                       | 2d         | 4d        | 6d         | 8d         | 10d       | 12d        | 14d        | 16d        | 18d        | 20d        | 22d        | 24d        | 26d       | 28d        | 30d         |
| 91-20-3           | 931             | 15.28±4.82               | 27.05±0.26 | 9.99±1.84 | 12.39±4.48 | 11.88±4.10 | 9.81±1.04 | 13.74±2.31 | 13.74±1.65 | 15.67±5.04 | 13.54±1.16 | 13.50±2.39 | 12.90±3.79 | 16.18±3.24 | 9.36±0.49 | 11.88±5.37 | 39.11±22.43 |
| 18433-98-2        | 519564          | 4.00±1.35                | 2.00±0.40  | 3.61±0.74 | 2.63±0.77  | 2.40±0.39  | 2.80±0.64 | 2.10±0     | 2.56±0.28  | 2.91±0.66  | 2.38±0.05  | 3.14±0.26  | 1.73±0     | 5.06±0     | 2.67±0    | 2.87±0     | 4.02±0.85   |
| 91-53-2           | 3293            | 1.18±0.13                |            | 1.13±0.10 | 1.42±0.22  | 2.49±0.49  | 1.74±0.71 | 1.89±0.05  | 1.33±0.50  | 1.85±0.49  | 1.38±0.04  | 1.75±0.05  | 2.61±0     | 1.24±0.16  | 0.94±0.14 | 1.55±0.28  | 2.10±0      |
| 123-32-0          | 31252           | 3.00±0                   |            | 0.88±0    |            |            |           | 2.04±0     |            |            | 1.38±0.6   | 1.83±0     |            |            |           |            | 1.33±0      |
| 1008-88-4         | 13886           | 1.60±0.90                | 3.13±0.11  | 2.18±0.39 | 2.38±0.52  | 3.02±0.30  | 3.02±0.62 | 3.26±0.63  | 2.90±0.44  | 3.42±0.43  | 3.58±0.14  | 3.04±0.82  | 4.59±1.73  | 5.03±0.72  | 3.27±0.11 | 3.69±1.28  | 8.55±3.92   |
| 55044-09-2        | 583842          | 4.19±1.27                |            |           |            |            |           |            |            |            |            |            |            | 5.19±0     |           |            |             |
| 90-12-0           | 7002            | 3.16±1.47                | 1.91±0.25  | 1.65±0    | 2.26±0.86  | 2.68±1.17  | 1.77±0.23 | 3.96±0.62  | 3.62±1.15  | 3.78±0.80  | 2.84±0.29  | 3.41±0.04  | 2.38±0.71  | 4.63±1.72  | 2.34±0.29 | 3.27±1.51  | 8.44±2.91   |
| 13360-            | 25916           | 9.88±0                   |            |           |            |            | 1.28±     | 4.56±0     | 2.35±0.    | 2.68±0     |            | 0.73±0     | 3.18±      | 2.52±0     |           |            |             |

|            |         |           |        |           |        |           |        |           |        |        |        |       |        |
|------------|---------|-----------|--------|-----------|--------|-----------|--------|-----------|--------|--------|--------|-------|--------|
| 65-1       |         |           |        | 0         | .39    | 87        |        |           | 0      |        |        |       |        |
| 95-20-5    | 7224    | 1.58±0.04 |        |           |        |           |        | 2.51±0.09 | 2.35±0 | 1.42±0 |        |       | 5.14±0 |
| 13067-27-1 | 83101   | 2.31±0    |        | 2.18±0.65 |        |           |        |           |        | 2.50±0 | 2.42±0 |       |        |
| 1746-11-8  | 101130  | 2.32±0    |        |           |        |           |        |           |        |        |        |       |        |
| 1558-17-4  | 15257   | 1.92±0    |        | 2.97±0    | 1.29±0 |           |        |           |        |        |        |       | 2.14±0 |
| 2349-70-4  | 3083760 | 1.18±0    |        |           |        |           |        |           |        |        |        |       |        |
| 4466-24-4  | 20534   | 1.30±0    |        | 1.19±0    |        | 1.91±0    |        | 1.96±0    | 1.90±0 | 0.85±0 |        |       |        |
| 1072-83-9  | 14079   |           | 0.90±0 |           |        |           |        | 0.95±0    |        | 1.19±0 |        |       |        |
| 2941-72-2  | 76254   |           | 1.08±0 |           |        |           |        | 1.51±0    |        |        |        |       |        |
| 10003      |         |           |        |           |        |           |        |           |        |        |        | 8.05  |        |
| 80-56-7    | 68109   |           | 3.41±0 |           | 1.66±0 | 6.22±0.63 |        |           |        | 1.93±0 | 0.97±0 | ±1.27 |        |
| 91-57-6    | 7055    |           | 1.06±0 |           |        |           |        |           |        |        | 1.21±0 |       |        |
| 10001      |         |           |        |           |        |           |        |           |        |        |        |       |        |
| 17-04-4    | 590619  |           | 1.00±0 |           |        |           | 1.06±0 |           |        |        |        |       |        |

|              |        |             |            |           |             |             |            |            |            |             |           |             |             |           |            |            |              |
|--------------|--------|-------------|------------|-----------|-------------|-------------|------------|------------|------------|-------------|-----------|-------------|-------------|-----------|------------|------------|--------------|
| 3208-16-0    | 18554  |             |            |           | 1.63±0      | 1.02±0      | 1.33±0     | 0.93±0     |            | 0.98±0      | 2.16±1.34 | 1.1±0       |             | 8.01±0    |            | 1.41±0     | 16.68±0      |
| 3777-69-3    | 19602  |             |            |           | 0.69±0      |             |            |            | 0.75±0     |             | 0.62±0    |             |             |           |            |            |              |
| 59958-20-2   | 181250 |             |            |           |             | 3.01±0.65   |            |            |            |             |           |             |             |           |            |            |              |
| 16498-4-44-5 | 188454 |             |            |           |             | 1.26±0.29   | 0.80±0.05  |            |            |             |           |             |             |           |            |            |              |
| 1008-89-5    | 13887  |             |            |           |             | 2.51±0      |            |            |            |             |           |             |             |           |            |            |              |
| 28712-62-1   | 120028 |             |            |           |             |             |            |            | 3.79±0     |             |           |             |             |           |            |            |              |
| 1122-58-3    | 14284  |             |            |           |             |             |            |            |            | 1.25±0      |           |             |             |           |            |            |              |
| 695-34-1     | 1533   |             |            |           |             |             |            |            |            | 1.02±0      |           |             |             |           |            |            |              |
| 56599-50-9   | 543312 |             |            |           |             |             |            |            |            |             |           |             |             |           |            |            | 7.94±0       |
| 104-46-1     | 637563 |             |            |           |             |             |            |            |            |             |           | 1.35±0.10   |             |           |            |            |              |
| 73285-35-5   |        |             |            | 5.67±0    |             |             |            |            |            |             |           |             |             |           |            |            | 15.12±0      |
| 629-78-7     | 12398  | 64.40±10.57 | 96.17±5.53 | 49.7±2.45 | 64.16±15.42 | 69.56±17.72 | 65.75±4.39 | 63.42±3.29 | 61.35±9.57 | 80.09±26.47 | 52.3±1.27 | 74.86±10.10 | 86.33±50.40 | 69.98±7.2 | 55.70±0.31 | 66.86±16.6 | 108.60±21.16 |

|            |        |            |            |            |            |           |            |         |            |            |           |           |            |           |           |           |           |
|------------|--------|------------|------------|------------|------------|-----------|------------|---------|------------|------------|-----------|-----------|------------|-----------|-----------|-----------|-----------|
| 10001      |        |            |            |            |            |           |            |         |            |            | 23.6      |           |            |           | 21.2      |           |           |
| 92-63-3    | 530429 | 22.88±2.78 | 16.15±1.68 | 21.69±5.11 | 21.93±4.54 | 23.92±0   | 20.82±0.48 | 23.41±0 | 24.13±7.42 | 18.43±0.95 | 5±3.37    | 41.53±0   | 19.12±0    |           | 6±5.12    | 26.87±0   |           |
| 629-62-9   | 12391  | 5.99±0.26  | 4.72±0.16  | 4.36±0.14  | 6.75±2.65  | 6.50±1.66 | 5.53±0.71  | 6.37±0  | 5.14±0.88  | 6.78±2.63  | 3.75±0.17 | 6.79±1.01 | 7.61±4.70  | 6.22±0.59 | 4.27±0    | 5.92±1.48 | 6.43±0.56 |
| 593-45-3   | 11635  | 3.90±0.54  | 6.41±0.17  | 2.95±0.57  | 4.63±0.64  |           | 5.16±0     | 4.11±0  | 4.54±0.90  | 5.60±1.61  | 4.96±0.83 | 5.94±1.31 | 5.95±3.40  | 4.42±0.38 | 3.63±0.17 | 3.82±0    | 7.92±0.86 |
| 544-76-3   | 11006  | 4.08±0     |            |            |            |           |            |         |            |            |           |           |            |           |           |           |           |
| 629-99-2   | 12406  | 4.24±0     |            | 5.17±0.86  | 7.69±0     |           | 7.53±0.39  |         | 6.90±0.84  |            |           | 8.70±1.91 | 11.22±6.22 | 7.73±0    | 7.54±0.61 | 7.86±1.86 | 10.78±0   |
| 629-94-7   | 12403  | 6.06±0     |            |            | 6.12±0     | 8.64±1.96 | 4.75±0     | 5.79±0  |            |            | 10.53±0   |           |            |           |           | 6.63±0    |           |
| 10001      |        |            |            |            |            |           |            |         |            |            | 3.15      |           |            |           |           |           |           |
| 92-65-0    | 543423 | 4.15±0     |            |            |            |           |            |         |            |            | ±0        |           |            | 1.89±0    |           |           |           |
| 14905-56-7 | 85785  | 1.86±0     |            |            | 4.00±2.63  | 6.63±0    |            | 7.94±0  | 4.50±0     | 8.38±0     |           |           |            |           |           |           |           |
| 55282-12-7 | 292285 | 0.84±0     | 1.83±0.11  | 1.01±0     |            | 0.99±0    | 0.78±0     | 0.71±0  |            | 0.89±0     |           |           |            |           | 1.11±0    | 1.69±0.55 |           |
| 55000-52-7 | 41282  |            | 29.76±0.79 |            |            | 22.14±0   |            | 17.19±0 |            |            |           | 12.25±0   | 23.25±0    | 17.33±0   |           | 35.72±0   |           |
| 629-       | 12401  |            | 8.74±0     |            |            | 9.37±0    |            | 6.35±0  |            | 8.18±2     | 7.18      |           |            | 8.34±0    |           |           | 17.84±    |

|            |         |         |           |        |        |         |        |           |           |           |        |           |           |         |
|------------|---------|---------|-----------|--------|--------|---------|--------|-----------|-----------|-----------|--------|-----------|-----------|---------|
| 92-5       |         | .59     |           |        |        | .22     |        | .23       | ±0        |           |        |           |           | 0       |
| 7390-81-0  | 23872   | 2.38±0  |           |        |        | 2.43±0  |        | 1.76±0    | 5.24±0    | 0.94±0    |        |           | 4.24±0    | 17.79±0 |
| 16489-32-0 | 565628  | 11.45±0 | 5.81±2.01 | 5.88±0 |        | 6.15±0  | 9.89±0 | 4.12±0.06 | 6.43±0.68 | 5.18±1.53 | 4.57±0 | 7.75±2.71 | 5.00±2.23 | 5.39±0  |
| 15780-34-4 | 162512  |         | 3.79±0    |        |        |         |        | 1.41±0    | 1.63±0    |           |        |           | 2.05±0    |         |
| 55044-09-2 | 583842  |         | 3.99±0    |        |        |         | 4.51±0 | 2.71±0    |           | 2.13±0.61 |        |           |           |         |
| 10001      |         |         |           |        |        |         |        |           |           |           |        |           |           |         |
| 90-92-9    | 601922  |         |           | 9.39±0 | 5.67±0 |         |        |           |           |           |        |           |           |         |
| 10002      |         |         |           |        |        | 10.48±0 |        |           |           | 16.99±0   |        |           |           |         |
| 23-00-7    | 535067  |         |           |        |        |         |        |           |           |           |        |           |           |         |
| 53818-14-7 | 143098  |         |           |        |        | 1.88±0  |        |           |           |           |        | 4.6±0     | 1.96±0    |         |
| 294-62-2   | 9268    |         |           |        |        | 0.72±0  |        |           |           | 0.85±0    |        |           |           | 0.95±0  |
| 21328-57-4 | 524413  |         |           |        |        | 0.75±0  |        |           |           |           |        |           |           |         |
| 16883-48-0 | 6429398 |         |           |        |        | 0.91±0  |        |           |           |           |        |           |           |         |
| 54833-23-7 | 41208   |         |           |        |        |         | 5.33±0 |           |           |           |        |           |           |         |

|              |          |            |            |            |            |            |            |            |            |            |            |            |             |            |            |             |            |        |
|--------------|----------|------------|------------|------------|------------|------------|------------|------------|------------|------------|------------|------------|-------------|------------|------------|-------------|------------|--------|
| 55668-09-2   | 544746   |            |            |            |            |            |            | 1.18±0     |            |            |            |            |             |            |            |             |            |        |
| 112-95-8     | 8222     |            |            |            |            |            |            |            | 0.97±0     |            |            |            | 3.06±0      |            |            |             |            |        |
| 1000156-14-5 | 572863   |            |            |            |            |            |            |            |            |            |            |            | 1.01±0      | 1.13±0     |            | 1.08±0      |            |        |
| 1921-70-6    | 15979    |            |            |            |            |            |            |            |            |            |            |            |             |            |            | 18.05±0     |            |        |
| 1000360-41-5 | 91693084 |            |            |            |            |            |            |            |            |            |            |            |             |            |            | 4.26±0      |            |        |
| 57366-09-3   | 549006   |            |            |            |            |            |            |            |            |            |            |            |             |            |            |             |            | 3.36±0 |
| 2579-04-6    | 5364555  | 18.40±2.12 | 22.43±0.32 | 11.09±1.82 | 18.55±4.93 | 20.03±5.62 | 18.39±1.93 | 15.46±4.61 | 17.16±2.83 | 22.92±9.08 | 13.69±0.04 | 20.93±3.05 | 23.46±15.22 | 18.54±1.16 | 13.47±0.53 | 16.43±3.32  | 26.43±2.17 |        |
| 1000131-11-8 | 5364560  | 15.32±4.68 | 23.59±1.49 | 15.17±0    |            |            | 21.76±0    | 20.04±0    | 16.83±0    |            |            |            | 27.11±14.59 | 19.38±0    | 15.37±0    |             |            |        |
| 18435-45-5   | 29075    | 3.00±0     |            | 13.76±0    | 20.55±3.72 | 24.81±5.02 | 24.82±0    | 22.43±0    | 25.54±0    | 27.74±6.95 | 19.91±1.33 | 27.55±5.64 | 7.96±0      | 23.85±0.25 | 20.88±0    | 15.08±12.48 | 36.83±9.94 |        |
| 33156-93-3   | 6440990  | 8.02±0     | 6.11±0.78  | 8.76±2.63  | 9.09±2.69  | 5.80±0     | 6.62±1.63  | 10.79±2.25 | 7.64±0.44  | 9.59±2.26  | 10.19±1.04 | 11.15±1.74 | 8.71±0      | 11.69±3.07 | 8.70±2.02  | 9.56±3.18   | 15.54±3.57 |        |

[illegible]

|            |          |        |        |        |           |        |           |        |           |        |        |        |        |         |  |
|------------|----------|--------|--------|--------|-----------|--------|-----------|--------|-----------|--------|--------|--------|--------|---------|--|
| 93-1       |          |        |        |        |           |        |           |        |           |        |        |        |        |         |  |
| 10001      |          |        |        |        |           |        |           |        |           |        |        |        |        |         |  |
| 94-37-0    | 605926   | 2.17±0 |        |        |           |        |           |        |           |        |        |        |        |         |  |
| 26456-76-8 | 5365055  |        | 1.23±0 | 1.10±0 | 1.65±0.32 | 1.40±0 | 1.37±0.28 | 1.89±0 | 1.60±0.34 | 1.74±0 | 1.69±0 | 1.60±0 | 1.01±0 | 1.27±0  |  |
| 10001      |          |        |        |        |           |        |           |        |           |        |        |        |        |         |  |
| 50-40-1    | 5367478  |        | 2.01±0 |        |           | 2.31±0 |           |        |           |        |        |        |        |         |  |
| 56318-84-4 | 15607494 |        |        | 1.05±0 |           |        |           |        | 1.32±0    |        |        |        |        |         |  |
| 56134-03-3 | 5352709  |        |        |        | 9.45±0    |        |           |        |           |        |        |        | 7.02±0 | 12.01±0 |  |
| 3983-06-0  | 138092   |        |        |        | 0.73±0    |        |           |        |           |        |        |        | 1.33±0 |         |  |
| 100-42-5   | 7501     |        |        |        |           | 1.05±0 |           |        | 0.93±0    |        | 1.45±0 | 0.90±0 | 1.00±0 |         |  |
| 74752-97-9 | 5368955  |        |        |        |           |        | 0.94±0.19 |        |           |        |        |        |        | 1.15±0  |  |
| 62185-56-2 | 545898   |        |        |        |           |        |           | 1.35±0 |           |        |        |        |        |         |  |
| 54344-61-5 | 171338   |        |        |        |           |        |           | 5.94±0 |           |        |        |        | 7.30±0 |         |  |
| 591-48-0   | 11573    |        |        |        |           |        |           |        | 1.07±0    |        |        |        |        |         |  |
| 35387-     | 520731   |        |        |        |           |        |           |        | 1.39±0    |        | 2.02±0 |        |        |         |  |



[illegible]

[illegible]

|            |           |         |        |        |        |        |
|------------|-----------|---------|--------|--------|--------|--------|
| 10001      |           | 1.49±0. |        |        | 1.34   |        |
| 55-88-8    | 556457    | 39      |        |        | ±0     | 1.57±0 |
| 5870-63-3  | 138916    | 0.60±0  | 1.64±0 |        |        | 0.68±0 |
| 7370-92-5  | 110977    |         | 3.04±0 |        |        |        |
| 10003      |           |         |        |        |        |        |
| 04-66-3    | 1845939   |         | 4.50±0 | 4.12±0 |        |        |
| 66884-74-0 | 75953512  |         | 3.71±0 |        |        | 2.29±0 |
| 26942-62-1 | 539006    |         |        | 0.81±0 |        |        |
| 22118-01-0 | 572612    |         |        | 1.95±0 |        |        |
| 4884-24-6  | 21003     |         |        |        | 0.78±0 |        |
| 77573-35-4 | 101288159 |         |        |        | 0.76±0 |        |
| 502-69-2   | 10408     |         |        |        | 0.94±0 |        |
| 12489      |           |         |        |        |        |        |
| 9-17-8     | 573565    |         |        |        |        | 1.63±0 |
| 58879-40-6 | 337818    |         |        |        |        | 1.82±0 |

|            |         |             |            |             |            |            |            |            |             |            |            |             |             |             |             |             |              |
|------------|---------|-------------|------------|-------------|------------|------------|------------|------------|-------------|------------|------------|-------------|-------------|-------------|-------------|-------------|--------------|
| 22476-61-5 | 214839  |             |            |             |            |            |            |            |             |            |            |             |             |             | 3.92±0      |             |              |
| 30316-33-7 | 594912  |             |            |             |            |            |            |            |             |            |            |             |             |             |             |             | 3.59±0       |
| 57-10-3    | 985     | 37.87±18.52 | 46.42±7.93 | 38.32±10.48 | 32.42±0.34 | 49.40±4.22 | 57.05±4.07 | 43.86±8.07 | 47.12±3.93  | 43.91±4.51 | 63.16±9.58 | 50.11±16.54 | 72.45±18.12 | 69.63±16.07 | 60±18.69    | 48.84±16.46 | 111.98±65.84 |
| 373-49-9   | 445638  | 12.19±6.06  | 12.22±2.00 | 14.42±4.14  | 14.38±1.02 | 22.93±1.59 | 25.37±1.65 | 16.05±0    | 22.07±2.06  | 20.77±2.63 | 29.73±5.48 | 21.90±7.38  | 24.50±0     | 32.54±6.90  | 39.13±0     | 22.52±6.51  | 76.49±0      |
| 64-19-7    | 176     | 23.79±12.89 | 6.29±0     | 20.69±0     | 5.35±0     | 13.18±0    | 34.90±0    | 40.73±3.79 | 24.92±12.56 | 12.59±4.33 | 10.08±0    | 32.46±15.95 | 23.65±0     | 41.26±0     |             | 18.68±0     |              |
| 107-92-6   | 264     | 0.63±0      | 2.61±1.24  | 3.77±0      | 0.94±0     | 2.45±0.92  | 1.89±0     | 2.19±0.48  | 2.06±0.57   |            |            |             | 4.13±0      | 1.72±0.17   | 2.13±1.10   | 0.86±0.16   |              |
| 544-63-8   | 11005   | 29.73±15.50 | 26.05±7.57 | 25.39±8.73  | 24.86±4.05 | 40.10±5.23 | 42.59±2.90 | 35.54±4.72 | 35.09±3.42  | 35.44±4.94 | 49.05±7.34 | 39.28±12.55 | 52.03±16.70 | 47.97±16.69 | 39.19±16.32 | 39.59±13.44 | 77.64±36.34  |
| 34450-18-5 | 1449    | 2.60±0      |            |             |            |            |            |            |             |            |            |             |             | 1.64±0      |             |             |              |
| 1002-84-2  | 13849   | 3.70±1.63   | 3.33±0     | 3.38±1.14   | 3.03±0.13  | 5.45±0.68  | 4.39±0.18  | 3.60±0.35  | 3.86±0.51   | 3.75±0.76  | 6.59±1.43  | 4.85±1.99   | 5.56±1.99   | 5.68±1.26   | 3.39±0.35   | 3.91±1.45   | 8.31±3.62    |
| 463-40-1   | 5280934 | 5.53±3.15   |            | 1.41±0.24   | 3.34±0     | 2.04±0.85  | 1.87±0.43  | 3.03±0.65  | 1.70±0.19   | 2.75±0.64  | 3.13±0.26  | 3.97±0.74   | 2.45±0      | 4.57±0.4    | 3.20±0      | 1.47±0      | 3.32±0       |

|            |        |           |           |           |           |           |           |           |           |           |           |           |           |           |           |           |            |
|------------|--------|-----------|-----------|-----------|-----------|-----------|-----------|-----------|-----------|-----------|-----------|-----------|-----------|-----------|-----------|-----------|------------|
| 112-80-1   | 445639 | 1.16±0.60 | 2.45±0.96 | 3.00±1.30 | 1.70±0    | 2.86±1.26 | 3.44±1.95 | 1.33±0    | 5.43±0    |           | 5.19±0.56 | 3.54±1.65 | 6.91±0    | 4.50±2.15 | 5.29±0    | 2.33±0.92 | 1.87±0     |
| 79-09-4    | 1032   | 2.35±0    |           | 1.15±0.30 | 1.74±0    |           | 1.55±0    | 0.77±0    | 1.74±0.65 |           | 3.47±0    | 1.04±0    |           | 2.34±0    | 2.57±0    |           |            |
| 10417-94-4 | 446284 | 0.00±0.00 | 3.53±0    | 0.96±0    | 2.00±0.12 | 1.25±0    |           | 1.75±0    |           | 0.89±0    | 1.83±0    | 2.42±0    | 3.00±2.07 | 2.45±0    | 1.22±0    | 2.47±0    | 2.48±0.71  |
| 4536-23-6  | 20653  | 0.92±0    |           |           |           |           |           | 0.77±0    |           |           |           | 2.56±0    |           |           |           | 0.89±0    |            |
| 6217-54-5  | 445580 | 4.79±0    | 1.00±0    | 5.39±1.50 | 4.37±3.07 | 5.41±3.88 | 7.04±0.46 | 9.41±1.56 | 4.89±3.16 | 7.64±2.87 | 7.90±1.45 | 6.03±4.15 | 9.80±5.22 | 5.25±1.05 | 7.21±1.42 | 5.90±4.12 | 16.39±6.13 |
| 143-07-7   | 3893   | 0.85±0    | 3.23±0    | 2.76±0    |           | 3.94±1.47 | 4.98±0    |           |           | 2.62±0    | 4.34±0.58 | 4.73±0    | 4.38±1.07 | 3.58±0.97 |           | 5.76±0    | 4.84±0.77  |
| 109-52-4   | 7991   | 43.92±0   |           |           |           |           | 1.70±0    | 3.15±0    |           |           |           | 0.85±0    |           |           |           | 2.02±0    |            |
| 503-74-2   | 10430  | 1.61±0    |           |           | 1.20±0    |           |           | 0.77±0    | 1.44±0    |           | 1.24±0    | 1.14±0    | 1.72±0    | 3.78±0    | 1.26±0    | 0.89±0    |            |
| 103-82-2   | 999    |           |           | 1.85±0    | 1.76±0    | 3.67±1.02 | 5.10±0.63 | 4.15±1.88 | 6.18±0    |           |           |           | 3.37±0    | 4.10±1.54 | 7.27±2.37 | 2.06±0    | 3.55±0     |
| 603-79-2   | 11782  |           |           | 0.76±0    |           |           |           |           |           |           |           |           |           | 1.07±0    |           |           |            |
| 57-11-4    | 5281   |           |           | 0.73±0    |           | 0.73±0    |           |           |           |           | 0.95±0.0  | 1.31±0    |           |           |           |           |            |



|              |          |             |            |            |            |            |            |            |            |            |            |            |             |            |            |            |             |
|--------------|----------|-------------|------------|------------|------------|------------|------------|------------|------------|------------|------------|------------|-------------|------------|------------|------------|-------------|
| 64-0         |          |             |            |            |            |            |            |            |            |            |            |            |             |            |            |            | ±0          |
| 16833-54-8   | 5312495  |             |            |            |            |            |            |            |            |            |            |            |             |            |            |            | 7.23        |
| 56554-89-3   | 5367669  |             |            |            |            | 1.58±0     |            |            |            |            |            | 0.65       |             |            |            |            | ±0          |
| 100-52-7     | 240      | 49.51±10.75 | 61.44±2.56 | 33.89±7.22 | 39.62±7.17 | 32.99±3.70 | 41.19±4.59 | 37.33±5.93 | 34.00±2.45 | 29.63±8.31 | 29.52±3.93 | 27.00±5.68 | 42.90±13.48 | 35.94±5.23 | 23.98±1.94 | 29.65±8.54 | 59.95±23.45 |
| 122-78-1     | 998      | 4.75±0.76   | 6.4±0.4    | 4.18±1.01  | 6.20±1.64  | 4.73±0.91  | 5.97±0.58  |            | 2.90±0.89  | 3.54±1.39  | 6.28±0     | 3.85±1.28  | 6.65±0      | 6.66±1.33  | 7.87±0     | 4.32±1.19  | 6.66±0.79   |
| 1000130-97-9 | 5363097  | 4.49±0      | 7.35±0.81  | 3.31±0     | 7.13±0     |            |            |            |            |            |            |            |             |            |            |            |             |
| 57295-30-4   | 585182   | 5.45±0      |            |            |            |            |            |            |            |            |            |            |             |            |            |            |             |
| 56829-23-3   | 5365665  | 16.10±4.45  |            | 11.57±3.29 | 10.82±2.18 | 8.91±1.22  | 9.68±0     | 11.71±3.33 | 10.64±1.17 | 7.33±0     | 12.06±2.66 | 10.88±1.42 | 13.55±3.17  | 15.32±3.00 | 15.32±0    | 12.22±0    |             |
| 4411-89-6    | 6429333  | 1.50±0.38   | 1.29±0     | 1.16±0.34  | 1.59±0.39  | 1.03±0.02  | 1.52±0.28  | 1.91±0.27  | 1.89±0.34  | 0.70±0     | 0.91±0.01  | 0.84±0.11  | 0.80±0      |            | 2.31±0     | 0.98±0.24  | 1.74±0.31   |
| 53447-47-5   | 71587170 | 8.32±2.13   |            | 4.85±0     | 8.04±2.10  | 7.12±1.65  | 6.33±1.54  | 7.37±0     |            | 8.55±0     |            | 8.15±0     | 12.59±0     |            |            |            |             |
| 629-80-1     | 984      | 3.59±0      | 8.67±2.1   | 3.01±0     | 8.78±0.57  | 6.56±0.33  | 6.28±2.70  | 4.47±0.29  | 5.71±0.92  | 5.69±0.31  | 9.66±2.38  | 5.98±3.24  | 5.65±2.02   | 4.50±0.07  | 2.27±0.37  | 8.19±4.23  | 18.07±9.17  |

|            |         |        |           |           |           |           |           |        |           |           |           |           |         |           |           |           |  |
|------------|---------|--------|-----------|-----------|-----------|-----------|-----------|--------|-----------|-----------|-----------|-----------|---------|-----------|-----------|-----------|--|
| 124-19-6   | 31289   |        | 1.34±0.39 | 1.31±0    |           |           |           |        |           |           |           |           | 3.55±0  |           |           |           |  |
| 111-71-7   | 8130    | 1.24±0 |           |           |           |           |           | 0.72±0 |           |           |           |           | 1.89±0  |           |           |           |  |
| 5910-87-2  | 5283339 | 1.54±0 |           |           |           | 1.19±0    |           |        |           |           |           |           | 1.25±0  | 0.85±0    |           |           |  |
| 4313-03-5  | 5283321 |        | 2.70±0.56 | 4.29±0.02 |           |           |           |        | 4.50±0    | 3.17±0.70 | 2.98±0.46 |           |         |           | 3.06±0.07 | 3.69±0.84 |  |
| 931-96-4   | 565407  |        | 5.97±0    | 4.68±0    | 5.50±0    | 6.10±0    |           |        | 5.12±0    |           | 2.10±1.48 | 11.60±0   | 13.22±0 | 10.04±0   | 5.54±1.61 | 7.97±0    |  |
| 23942-00-9 | 585875  |        | 6.48±0    |           |           |           |           |        |           |           |           |           |         |           |           |           |  |
| 4748-78-1  | 20861   |        | 3.46±0    | 2.08±0    | 3.11±0.47 | 2.63±0.23 | 2.66±0.19 | 2.35±0 | 2.57±0.45 | 2.57±0.51 |           | 2.65±0.47 | 2.43±0  | 1.74±0.48 | 1.04±0    | 3.96±0.98 |  |
| 41438-18-0 | 458185  |        |           | 4.24±0    | 2.35±0.99 |           | 1.82±0    |        |           | 3.56±0    | 2.98±1.19 | 4.28±0    |         |           | 4.26±0    | 2.96±0    |  |
| 85896-31-7 | 522841  |        |           |           | 2.16±0    |           | 2.47±0    |        |           | 2.14±0    |           |           |         |           | 2.13±0    |           |  |
| 30361-28-5 | 5283329 |        |           |           | 1.24±0.38 | 1.39±0    |           | 1.28±0 |           | 1.22±0    |           |           | 1.03±0  |           |           | 2.10±0    |  |
| 557-48-2   | 643731  |        |           |           | 1.86±0    |           |           |        |           |           |           | 1.65±0    |         |           |           |           |  |
| 2423-      | 5364492 |        |           |           | 1.15±0    |           |           |        |           | 3.18      |           |           |         |           |           |           |  |



|              |         |           |           |           |           |           |           |           |           |           |           |           |           |            |           |           |            |        |    |
|--------------|---------|-----------|-----------|-----------|-----------|-----------|-----------|-----------|-----------|-----------|-----------|-----------|-----------|------------|-----------|-----------|------------|--------|----|
| 10-1         |         |           |           |           |           |           |           |           |           |           |           |           |           |            |           |           |            |        | ±0 |
| 20235-19-2   | 854     |           |           |           |           |           | 1.23±0    |           |           |           |           |           |           |            |           |           |            |        |    |
| 21834-92-4   | 5370602 |           |           |           |           |           |           | 2.19±0    |           |           |           | 2.46±0    |           |            |           |           |            |        |    |
| 1000461-11-8 |         |           |           |           |           |           |           |           |           |           |           | 1.52±0    |           | 1.95±0     |           |           |            | 3.12±0 |    |
| 56554-87-1   | 5367668 |           |           |           |           |           |           |           |           |           |           |           | 1.77±0    |            |           |           | 1.21±0     |        |    |
| 1196-67-4    | 5372857 |           |           |           |           |           |           |           |           |           |           |           |           | 1.25±0     |           |           |            |        |    |
| 63521-76-6   | 544162  |           |           |           |           |           |           |           |           |           |           |           |           |            |           | 2.82±0    |            |        |    |
| 500-66-3     | 10377   | 4.68±1.78 | 6.78±0.12 | 5.10±0.52 | 8.11±2.08 | 5.26±1.18 | 7.76±0.54 | 6.20±0.24 | 8.37±0.40 | 9.60±3.38 | 6.06±0.30 | 8.09±0.66 | 7.71±3.65 | 10.52±0.56 | 7.86±1.23 | 9.08±1.88 | 13.65±1.34 |        |    |
| 3391-86-4    | 18827   | 1.20±0    |           | 1.18±0    | 0.60±0    |           |           |           |           |           | 0.82±0    |           |           |            |           |           |            |        |    |
| 5353-25-3    | 5364713 | 2.17±0.92 | 2.99±1.60 | 3.74±0    | 4.38±0.36 | 1.94±0.05 | 1.92±0.68 | 1.75±0    | 1.52±0.53 | 1.55±0.37 | 4.78±2.03 | 1.21±0    | 2.01±0    | 2.13±0     |           | 1.28±0    | 5.83±0     |        |    |
| 1855-09-0    | 15825   | 2.83±0    | 3.78±0    |           |           |           |           |           |           | 1.33±0    | 1.71±0    |           |           |            |           |           |            |        |    |
| 18240-10-3   | 86682   | 10.71±0   |           | 5.68±0    |           |           | 5.17±0    | 5.68±0    |           |           |           |           | 7.35±0    | 7.29±0     |           |           |            |        |    |

|              |          |           |           |        |        |        |        |        |           |        |        |        |
|--------------|----------|-----------|-----------|--------|--------|--------|--------|--------|-----------|--------|--------|--------|
| 22117-09-5   | 5367371  | 2.14±0    |           | 3.39±0 |        | 2.82±0 | 3.18±0 | 3.65±0 | 3.08±0    | 3.65±0 | 3.99±0 | 5.25±0 |
| 30385-19-4   | 545738   | 3.58±0.34 |           | 2.56±0 | 1.09±0 |        | 0.88±0 |        |           |        |        |        |
| 1454-84-8    | 80281    | 4.22±0    | 4.21±0.22 | 2.23±0 |        | 3.02±0 | 3.25±0 | 2.92±0 | 2.58±0.01 | 1.26±0 | 2.53±0 | 5.02±0 |
| 24347-58-8   | 225936   | 3.73±0    |           |        | 2.57±0 | 2.42±0 | 0.93±0 |        |           | 1.39±0 | 4.95±0 | 0.88±0 |
| 766-00-7     | 69833    | 3.84±0    |           | 2.56±0 |        |        |        |        |           |        |        |        |
| 468-68-8     | 3080551  | 2.17±0    | 1.06±0    |        |        |        |        |        |           |        |        |        |
| 34492-42-7   | 5368564  | 2.01±0    |           | 1.66±0 |        |        |        | 1.75±0 |           |        |        |        |
| 6728-31-0    | 5362814  | 1.34±0    |           |        |        |        |        |        |           |        |        |        |
| 1075-04-3    | 15825    |           | 2.50±0    |        | 2.29±0 | 1.19±0 |        |        | 2.17±0    |        |        |        |
| 1464-44-4    | 65080    |           | 1.89±0.49 |        |        |        |        |        |           |        |        |        |
| 1000193-38-7 | 565579   |           | 3.90±1.42 |        |        | 4.67±0 |        |        | 9.09±0    | 2.63±0 |        | 8.45±0 |
| 17289-61-1   | 11579182 |           |           | 1.08±0 |        |        |        |        |           |        |        |        |

|              |           |        |           |        |           |        |        |        |        |        |
|--------------|-----------|--------|-----------|--------|-----------|--------|--------|--------|--------|--------|
| 96-07-1      | 95331     | 0.78±0 |           |        |           |        | 1.43±0 |        |        |        |
| 698-87-3     | 94185     | 0.76±0 |           |        |           |        |        |        |        |        |
| 10001        |           |        |           |        |           |        | 7.52   |        |        |        |
| 96-32-3      | 565522    | 7.77±0 | 6.52±0    |        | 5.39±0.45 | 8.99±0 | ±1.60  | 8.99±0 | 4.28±0 | 7.44±0 |
| 90970-69-7   | 114544    | 1.20±0 |           |        |           |        |        | 1±0    |        |        |
| 35727-45-8   | 101316861 | 0.91±0 |           |        |           |        |        |        |        |        |
| 5181-75-9    | 291783    | 0.93±0 | 1.82±0.25 |        | 0.98±0    | 1.81±0 |        | 3.44±0 | 0.68±0 | 1.60±0 |
| 56045-33-1   | 556415    | 1.37±0 |           |        |           |        |        |        |        |        |
| 11722-1-78-0 | 556791    | 1.77±0 |           |        |           |        |        |        |        |        |
| 10001        |           |        |           |        |           |        |        |        |        |        |
| 87-22-4      | 580092    |        | 0.80±0    | 1.41±0 |           |        |        |        |        |        |
| 10001        |           |        |           |        |           |        |        |        |        |        |
| 84-98-8      | 561943    |        | 2.54±0    | 3.21±0 |           | 4.70±0 |        | 2.41±0 | 3.33±0 | 5.87±0 |
| 11966-0-66-1 | 608998    |        |           | 1.98±0 |           |        |        | 1.71±0 |        |        |
| 655-         | 95447     |        |           | 1.35±  |           |        |        |        | 1.20±0 | 1.16±0 |

|            |          |        |           |        |  |        |
|------------|----------|--------|-----------|--------|--|--------|
| 48-1       |          | 0      |           |        |  |        |
| 53404-49-2 | 62044    | 1.22±0 |           |        |  |        |
| 1454-85-9  | 15076    | 4.99±0 |           |        |  |        |
| 10001      |          |        |           |        |  |        |
| 29-79-9    | 560124   | 0.74±0 |           |        |  |        |
| 51937-00-9 | 6436736  |        | 7.20±0    |        |  |        |
| 23261-20-3 | 15942827 |        | 1.31±0.29 | 0.98±0 |  |        |
| 7212-44-4  | 5284507  |        | 1.22±0    |        |  |        |
| 10001      |          |        |           |        |  |        |
| 31-11-4    | 5364768  |        | 1.09±0    | 1.42±0 |  | 1.17±0 |
| 10579      | 537071   |        | 3.89±0    | 2.60±0 |  |        |
| 17367-07-6 | 5367702  |        |           | 2.33±0 |  | 3.77±0 |
| 90676-25-8 | 138614   |        |           | 3.07±0 |  |        |
| 7735-42-4  | 82184    |        |           | 3.19±0 |  |        |
| 4621-      | 20739    |        |           | 1.31±0 |  |        |

|            |         |           |            |           |            |           |           |           |           |           |        |            |            |           |           |           |             |  |
|------------|---------|-----------|------------|-----------|------------|-----------|-----------|-----------|-----------|-----------|--------|------------|------------|-----------|-----------|-----------|-------------|--|
| 04-9       |         |           |            |           |            |           |           |           |           |           |        |            |            |           |           |           |             |  |
| 10001      |         |           |            |           |            |           |           |           |           |           |        |            |            |           |           |           |             |  |
| 30-07-6    | 345716  |           |            |           |            |           |           |           |           |           |        | 1.26±0     |            |           |           |           |             |  |
| 10001      |         |           |            |           |            |           |           |           |           |           |        |            |            |           |           |           |             |  |
| 28-40-9    | 242517  |           |            |           |            |           |           |           |           |           |        |            |            | 1.73±0    |           |           |             |  |
| 2490-48-4  | 17218   |           |            |           |            |           |           |           |           |           |        |            |            | 4.18±0    |           |           | 5.52±0      |  |
| 77611-58-6 | 560936  |           |            |           |            |           |           |           |           |           |        |            |            |           |           | 2.45±0    |             |  |
| 10001      |         |           |            |           |            |           |           |           |           |           |        |            |            |           |           |           |             |  |
| 31-10-9    | 5283296 |           |            |           |            |           |           |           |           |           |        |            |            |           |           |           | 5.91±0      |  |
| 33425-30-8 | 87985   |           |            |           |            | 16.11±0   |           |           |           | 29.16±0   |        |            |            |           |           |           |             |  |
| 10002      |         |           |            |           |            |           |           |           |           |           | 10.8   |            |            |           |           |           |             |  |
| 22-86-6    | 9602988 | 5.19±1.02 | 19.49±4.99 | 5.13±2.68 | 12.21±8.06 | 8.64±4.93 | 5.34±1.52 | 2.09±0.52 | 6.55±3.75 | 9.90±1.67 | 9±6.80 | 12.24±3.55 | 11.27±4.04 | 8.17±1.32 | 1.27±0.16 | 7.79±4.55 | 53.68±37.18 |  |
| 131-11-3   | 8554    | 1.55±0.48 | 1.42±0.27  |           |            | 0.85±0    | 1.55±0    | 2.12±0.41 | 0.72±0    | 0.80±0    | 1.08±0 | 1.10±0     | 2.25±0.54  | 2.29±0.41 | 2.21±0.49 | 3.52±2.00 | 7.30±2.82   |  |
| 24691-16-5 | 229657  | 1.11±0    |            |           | 1.14±0     | 1.05±0    | 0.97±0    | 0.72±0    | 0.75±0    |           |        |            |            |           | 0.80±0    |           |             |  |
| 2566-90-7  | 6421262 | 0.68±0    |            |           |            |           |           |           |           |           | 0.93±0 |            |            |           |           |           |             |  |

|            |           |           |           |           |           |        |           |           |           |           |           |           |           |           |           |           |           |
|------------|-----------|-----------|-----------|-----------|-----------|--------|-----------|-----------|-----------|-----------|-----------|-----------|-----------|-----------|-----------|-----------|-----------|
| 112-23-2   | 8169      | 1.80±0.33 |           | 1.23±0    | 0.63±0    |        |           | 0.74±0    |           | 0.70±0.08 | 2.73±0    |           | 0.90±0    | 0.97±0    |           |           |           |
| 2716-53-2  | 5364833   | 0.70±0    |           |           | 1.82±0    | 3.15±0 |           | 3.13±0.57 | 3.21±0.04 |           |           | 3.29±0    | 2.11±0    |           | 9.49±0    |           |           |
| 76337-16-1 | 637195    | 1.65±0    |           |           |           |        |           | 2.33±0    |           |           |           |           |           |           |           |           |           |
| 1499-53-2  | 226558    | 1.57±0    |           |           |           |        |           |           |           | 1.45±0    |           |           |           |           | 1.93±0    |           |           |
| 80-27-3    | 62328     | 5.22±1.48 |           |           |           |        |           |           |           |           |           |           |           |           |           |           |           |
| 10236-16-5 | 637195    | 2.18±0    | 4.17±0.71 | 2.38±0.91 | 3.28±0.1  |        | 3.14±0.15 | 2.72±0.19 | 2.60±0    | 3.06±0.74 | 4.43±1.72 | 3.22±0.85 | 4.28±1.63 | 3.59±0.8  | 3.82±1.57 | 3.45±1.67 | 7.28±3.47 |
| 628-97-7   | 12366     | 1.63±0    | 1.15±0    | 1.33±0    | 1.13±0.05 | 1.72±0 | 1.63±0.27 | 1.24±0    | 1.53±0.08 | 1.24±0    | 1.97±0.60 | 1.32±0.51 | 2.25±0.85 | 1.80±0.19 | 1.75±0.63 | 1.15±0.16 | 2.60±0.94 |
| 112-39-0   | 8181      | 0.78±0    |           |           |           |        | 0.78±0    |           |           |           |           | 0.71±0    |           | 0.72±0    | 0.74±0    |           |           |
| 55724-48-6 | 101287780 | 1.09±0    |           |           |           |        |           |           |           |           |           |           |           |           | 1.81±0    |           |           |
| 17092-92-1 | 6432173   | 0.92±0    |           |           |           |        |           |           |           |           |           |           |           |           |           |           |           |
| 89-48-5    | 27867     | 4.42±0    |           |           |           |        |           |           |           |           |           |           |           |           |           | 2.58±0    |           |
| 28474-     | 168814    | 0.84±0    |           |           |           | 1.23±0 |           |           |           |           | 1.32      |           |           |           | 0.85      |           |           |

|            |           |              |              |                |              |                 |              |              |               |              |
|------------|-----------|--------------|--------------|----------------|--------------|-----------------|--------------|--------------|---------------|--------------|
| 90-0       |           |              |              |                |              |                 |              | $\pm 0.3$    |               | $\pm 0$      |
|            |           |              |              |                |              |                 |              | 6            |               |              |
| 77508-64-6 | 101280823 | $1.19 \pm 0$ |              | $1.20 \pm 0$   |              | $1.00 \pm 0$    |              |              |               | $1.30 \pm 0$ |
| 10003      |           |              |              |                |              |                 |              |              |               |              |
| 36-36-7    | 14122946  |              | $1.40 \pm 0$ |                |              |                 |              |              |               |              |
| 10001      |           |              |              |                |              |                 |              |              |               |              |
| 31-33-2    | 5363633   |              | $2.15 \pm 0$ |                |              |                 |              | $1.11 \pm 0$ |               | $3.52 \pm 0$ |
| 10605-09-1 | 54725318  |              | $1.04 \pm 0$ |                |              | $0.75 \pm 0$    |              |              |               |              |
| 10003      |           |              |              |                |              |                 |              |              |               |              |
| 05-65-2    | 6422010   |              | $2.67 \pm 0$ | $2.85 \pm 0$   | $4.38 \pm 0$ |                 |              |              | $10.83 \pm 0$ |              |
| 10003      |           |              |              |                |              |                 |              |              |               |              |
| 30-54-1    | 5461492   |              | $2.25 \pm 0$ | $2.99 \pm 1.2$ | $3.61 \pm 0$ | $3.61 \pm 0.48$ | $4.94 \pm 0$ |              |               | $3.87 \pm 0$ |
| 10004      |           |              |              |                |              |                 |              |              |               |              |
| 66-87-1    | 165361954 |              | $0.75 \pm 0$ |                |              |                 |              |              |               |              |
| 10001      |           |              |              |                |              |                 |              |              |               |              |
| 30-99-3    | 5363221   |              | $0.82 \pm 0$ |                |              |                 |              |              |               | $1.12 \pm 0$ |
| 10001      |           |              |              |                |              |                 |              |              |               |              |
| 30-97-     | 5365029   |              |              | $1.33 \pm 0$   |              |                 |              |              |               |              |

[illegible]



[illegible]

|            |          |            |            |            |             |            |            |            |            |             |          |            |            |            |          |             |            |        |
|------------|----------|------------|------------|------------|-------------|------------|------------|------------|------------|-------------|----------|------------|------------|------------|----------|-------------|------------|--------|
| 10001      |          |            |            |            |             |            |            |            |            |             |          |            |            |            |          |             |            |        |
| 31-36-3    | 5367730  |            |            |            |             |            |            |            |            |             |          |            | 1.96±0     |            |          |             |            |        |
| 56687-67-3 | 534623   |            |            |            |             |            |            |            |            |             |          |            |            | 1.80±0.82  |          |             |            |        |
| 84494-70-2 | 5353613  |            |            |            |             |            |            |            |            |             |          |            |            | 1.08±0     |          |             |            |        |
| 10003      |          |            |            |            |             |            |            |            |            |             |          |            |            |            |          |             |            |        |
| 91-10-5    | 91695146 |            |            |            |             |            |            |            |            |             |          |            |            | 1.00±0     |          |             |            |        |
| 10001      |          |            |            |            |             |            |            |            |            |             |          |            |            |            |          |             |            |        |
| 28-67-1    | 536834   |            |            |            |             |            |            |            |            |             |          |            |            | 7.84±0     |          |             |            |        |
| 22522-34-5 | 5365040  |            |            |            |             |            |            |            |            |             |          |            |            |            | 0.82±0   |             |            |        |
| 107-43-7   | 249      |            |            |            |             |            |            |            |            |             |          |            |            |            |          | 1.20±0      |            |        |
| 62555-02-6 | 71385260 | 2.30±0     |            |            |             |            |            |            |            |             |          |            |            |            |          |             |            | 2.59±0 |
| 5637-97-8  | 3639916  |            |            |            |             |            |            |            | 1.80±0     |             | 1.37±0   |            |            |            |          |             |            |        |
| 10001      |          |            |            |            |             |            |            |            |            |             |          |            |            |            |          |             |            |        |
| 30-04-4    | 541568   |            |            |            | 1.06±0      |            |            |            |            |             |          |            |            | 1.53±0     |          |             |            |        |
| 128-37-0   | 31404    | 49.31±6.49 | 28.00±6.35 | 38.91±5.17 | 46.75±13.77 | 48.04±9.65 | 52.75±1.91 | 48.91±3.71 | 45.68±2.31 | 56.82±18.90 | 42.30±1. | 54.45±4.59 | 73.50±36.7 | 62.68±9.13 | 51.99±8. | 47.37±10.43 | 66.41±1.24 |        |

|              |         |           |        |        |           |        |        |           |        |    |        |
|--------------|---------|-----------|--------|--------|-----------|--------|--------|-----------|--------|----|--------|
|              |         |           |        |        |           |        |        | 97        | 0      | 78 |        |
| 2896-60-8    | 17927   | 1.24±0.47 | 0.96±0 |        |           |        |        | 1.09±0    | 0.93±0 |    |        |
| 1126-61-0    | 70775   |           | 1.16±0 | 1.20±0 | 0.93±0.18 | 1.19±0 | 1.22±0 | 1.14±0    | 2.06±0 |    | 1.25±0 |
| 2416-94-6    | 17016   |           | 1.15±0 |        |           |        |        |           |        |    |        |
| 3855-26-3    | 77462   |           |        |        | 4.02±0    |        |        |           |        |    | 1.65±0 |
| 3180-09-4    | 18515   |           |        |        |           |        |        | 0.74±0.09 |        |    |        |
| 4025-37-0    | 97697   |           |        |        |           |        |        | 0.83±0    |        |    |        |
| 1000152-81-2 | 6432249 |           |        |        |           |        |        | 2.63±0    |        |    |        |
| 1000337-61-7 | 5306963 |           |        |        |           |        |        | 1.56±0    |        |    |        |
| 104-63-2     | 4348    |           |        |        |           |        |        | 4.63±0    |        |    |        |
| 108-45-2     | 7935    |           |        |        |           |        | 1.98±0 |           |        |    |        |
| 134001-62-0  | 547067  |           |        |        |           | 0.97±0 |        |           |        |    |        |

[illegible]

| 3                 |           |                          |           |        |        |    |     |           |        |        |           |          |           |           |           |         |
|-------------------|-----------|--------------------------|-----------|--------|--------|----|-----|-----------|--------|--------|-----------|----------|-----------|-----------|-----------|---------|
| 10003             |           |                          |           |        |        |    |     |           |        |        |           |          |           |           |           |         |
| 03-08-5           | 6422106   |                          |           |        |        |    |     | 1.86±0    | 1.84±0 |        |           |          | 1.03±0    |           |           |         |
| 140-67-0          | 8815      | 1.09±0                   | 1.08±0    | 0.73±0 | 1.60±0 |    |     | 1.42±0.21 | 1.24±0 | 0.82±0 | 0.72±0    | 1.37±0.4 | 1.89±0.23 | 1.01±0.09 | 1.43±0.47 | 1.76±0  |
| 538-86-3          | 10869     |                          |           |        |        |    |     | 3.33±0    |        |        |           |          |           | 3.04±0    |           |         |
| 104-46-1          | 637563    |                          |           |        |        |    |     |           |        |        |           |          |           |           |           | 3.34±0  |
| 622-60-6          | 73955     |                          |           |        |        |    |     |           |        |        |           |          |           |           |           | 2.45±0  |
| 54060-30-9        | 104682    |                          | 6.18±1.32 |        |        |    |     |           |        | 4.67±0 | 7.29±1.01 |          |           | 8.50±0    |           | 16.65±0 |
| 10001             |           |                          |           |        |        |    |     |           |        |        |           |          |           |           |           |         |
| 50-17-9           | 546887    |                          |           |        |        |    |     |           |        | 1.29±0 |           |          |           |           |           |         |
| 74744-55-1        | 5367448   |                          |           |        |        |    |     |           |        |        |           | 2.54±0   | 2.40±0    |           |           |         |
| 16695-32-2        | 86051     |                          | 3.67±2.56 |        |        |    |     |           |        |        |           |          |           | 3.56±0    |           |         |
| Imported fishmeal |           |                          |           |        |        |    |     |           |        |        |           |          |           |           |           |         |
| CAS               | Compo und | Relative content (µg/kg) |           |        |        |    |     |           |        |        |           |          |           |           |           |         |
|                   |           | 0d                       | 2d        | 4d     | 6d     | 8d | 10d | 12d       | 14d    | 16d    | 18d       | 20d      | 22d       | 24d       | 26d       | 28d 30d |

| CID       |        |               |               |              |               |               |              |             |              |              |               |             |              |             |               |              |              |
|-----------|--------|---------------|---------------|--------------|---------------|---------------|--------------|-------------|--------------|--------------|---------------|-------------|--------------|-------------|---------------|--------------|--------------|
| 91-20-3   | 931    | 38.21±15.24   | 34.87±13.32   | 32.28±4.81   | 69.76±30.92   | 40.22±7.97    | 30.49±1.00   | 27.54±1.22  | 29.48±4.68   | 61.91±12.21  | 33.51±6.95    | 24.43±4.51  | 46.40±9.01   | 41.00±1.97  | 54.85±19.18   | 60.08±15.92  | 67.25±13.67  |
| 91-53-2   | 3293   | 419.28±141.14 | 371.40±166.29 | 252.53±25.70 | 496.32±125.00 | 450.30±121.49 | 308.02±11.87 | 268.49±0.82 | 269.23±21.23 | 400.79±44.81 | 322.04±12.047 | 146.32±2.87 | 274.95±8.178 | 187.25±8.83 | 334.30±11.530 | 275.02±58.02 | 353.73±16.17 |
| 1008-88-4 | 13886  |               |               |              |               |               |              |             |              |              |               | 3.10±0      | 5.11±2.13    | 4.82±0      | 9.99±4.06     | 11.32±0      | 9.67±4.36    |
| 91-57-6   | 7055   | 8.55±3.29     |               | 8.68±0       |               | 11.76±2.65    | 9.49±0.72    | 8.46±0.37   | 7.64±1.30    | 26.58±2.55   | 10.57±2.84    | 6.49±0.23   | 14.89±1.74   | 13.88±1.19  | 22.90±7.96    | 15.88±4.05   | 29.70±5.95   |
| 3208-16-0 | 18554  |               | 4.92±0        | 4.42±0       | 9.43±0        |               | 4.50±0       | 2.37±0      |              | 3.56±0       | 2.14±0        |             | 3.29±0       |             | 3.55±0        |              |              |
| 5995      |        |               |               |              |               |               |              |             |              |              |               |             |              |             |               |              |              |
| 8-20-2    | 181250 | 4.99±0        |               | 5.27±0       |               |               |              |             |              |              |               |             |              |             |               |              |              |
| 1648      |        |               |               |              |               |               |              |             |              |              |               |             |              |             |               |              |              |
| 9-90-0    | 86013  | 46.13±18.56   | 46.55±16.36   | 29.36±7.55   | 55.69±15.29   | 37.76±10.8    | 29.79±1.94   | 28.81±2.21  | 35.44±7.42   | 40.51±6.46   | 31.38±10.32   | 15.64±2.32  | 32.13±6.42   | 20.46±0.57  | 36.35±12.83   | 29.14±0.99   | 43.69±2.27   |
| 1810      |        |               |               |              |               |               |              |             |              |              |               |             |              |             |               |              |              |
| 8-56-0    | 614744 | 15.08±3.61    | 4.58±0        | 8.68±0       |               | 27.28±8.01    | 9.55±4.84    | 7.89±4.38   | 3.82±0       | 13.94±5.57   | 16.56±4.96    | 18.65±0     |              |             |               |              |              |
| 9300      |        |               |               |              |               |               |              |             |              |              |               |             |              |             |               |              |              |
| 8-87-8    | 617681 | 16.92±6.60    | 7.40±0.83     | 6.82±3.20    | 20.52±8.16    | 18.10±0       | 8.39±0       | 8.36±2.94   | 8.55±3.25    | 24.23±17.51  | 9.57±1.07     | 29.37±2.49  | 30.83±6.97   | 44.73±4.32  | 48.21±11.69   |              | 39.45±15.36  |

|            |         |        |           |           |        |           |           |           |        |        |        |        |        |           |           |         |         |
|------------|---------|--------|-----------|-----------|--------|-----------|-----------|-----------|--------|--------|--------|--------|--------|-----------|-----------|---------|---------|
| 147-47-7   | 8981    | 3.10±0 | 4.54±1.48 | 2.62±0    | 5.13±0 | 3.62±0    |           |           |        |        |        |        |        |           |           |         |         |
| 65539-79-9 | 5374980 | 2.71±0 | 4.30±0.8  | 3.84±0    | 3.94±0 | 6.19±2.50 | 5.36±0.18 | 4.82±1.13 | 4.18±0 |        |        |        |        |           |           | 4.35±0  |         |
| 70424-13-4 | 5370006 |        | 8.57±0    | 8.40±0.01 | 7.59±0 | 3.41±0    | 13.00±0   | 3.79±0    | 6.67±0 |        | 3.89±0 | 2.68±0 |        | 4.27±0    | 8.95±1.26 | 6.85±0  |         |
| 23095-44-5 | 96943   |        |           |           |        | 20.70±0   | 4.30±0    |           |        | 4.71±0 |        |        |        |           |           | 27.39±0 | 27.98±0 |
| 84679-58-3 | 614550  |        |           |           |        | 13.76±0   |           |           | 4.02±0 |        |        | 3.16±0 | 4.41±0 | 6.79±2.71 |           | 5.91±0  |         |
| 54964-85-1 | 281839  |        |           |           |        | 11.07±0   |           |           |        |        |        |        |        |           |           |         |         |
| 46873-19-2 | 618028  |        |           |           |        |           |           |           |        |        |        |        |        |           | 11.85±0   |         |         |
| 3606-26-6  | 615798  | 5.62±0 |           |           |        |           |           |           |        |        |        |        |        |           |           | 8.37±0  |         |
| 132-64-9   | 568     |        |           |           |        |           |           |           |        |        |        |        |        |           | 6.29±0    | 10.64±0 |         |
| 582-16-1   | 11396   |        |           |           |        |           |           |           |        |        |        |        |        |           | 6.21±0    |         |         |

[illegible]



[illegible]

|                      |             |        |               |               |               |                 |                |                |                |                 |           |                   |                |                     |         |             |
|----------------------|-------------|--------|---------------|---------------|---------------|-----------------|----------------|----------------|----------------|-----------------|-----------|-------------------|----------------|---------------------|---------|-------------|
| 1921<br>-70-6        | 15979       |        |               |               |               | 58.94±<br>11.81 |                |                | 40.61±<br>5.93 | 38.27±<br>11.04 | 16.00±0   | 48.2<br>2±0       | 35.93±6.<br>08 | 56.8<br>4±19<br>.00 | 23.82±0 | 56.83±<br>0 |
| 1000<br>150-<br>98-9 | 617625      | 3.54±0 | 4.30±0        | 2.35±0        | 4.96±0        | 7.30±0          | 6.75±0<br>.56  | 6.51±<br>0.83  | 3.71±0         |                 | 3.95±1.39 | 1.80<br>±0        |                |                     |         |             |
| 2425<br>1-86-<br>3   | 520105      |        |               |               |               | 4.37±0          |                |                |                |                 |           |                   |                |                     |         |             |
| 1560<br>-96-9        | 15269       |        |               |               |               |                 | 2.83±0         |                |                |                 |           |                   |                |                     |         |             |
| 1000<br>192-<br>21-5 | 536822<br>6 |        |               |               |               |                 |                |                |                |                 |           |                   |                |                     |         | 15.25<br>±0 |
| 638-<br>36-8         | 12523       |        |               |               |               |                 |                |                |                |                 |           |                   |                |                     |         | 14.31<br>±0 |
| 2579<br>-04-6        | 536455<br>5 | 5.08±0 | 6.89±0.<br>86 | 4.95±0<br>.50 | 8.17±1.<br>32 | 14.56±<br>3.95  | 10.00±<br>1.72 | 10.96<br>±0.28 | 5.42±0         | 4.97±0          | 3.20±0    | 5.73<br>±1.3<br>5 | 4.78±0         |                     |         |             |
| 1843<br>5-45-<br>5   | 29075       |        |               |               | 2.57±0        |                 |                | 5.28±0         |                |                 |           |                   |                |                     |         |             |
| 3315<br>6-93-<br>3   | 644099<br>0 | 3.88±0 | 7.88±2.<br>77 | 4.76±0<br>.48 | 7.16±0        | 4.63±1.<br>21   | 4.79±0         | 3.88±<br>0.21  | 2.47±0         |                 |           |                   |                |                     |         |             |

[illegible]

|               |           |               |              |              |               |              |              |             |              |               |              |             |              |             |              |               |              |
|---------------|-----------|---------------|--------------|--------------|---------------|--------------|--------------|-------------|--------------|---------------|--------------|-------------|--------------|-------------|--------------|---------------|--------------|
| 6114          |           |               |              |              |               |              |              |             |              |               |              |             |              |             |              |               |              |
| 2-06-1        | 565944    |               |              |              |               |              |              |             | 6.12±0       |               | 14.02±0      |             |              |             | 8.52±0       |               |              |
| 1139-30-6     | 1742210   |               |              |              |               |              |              |             |              |               |              |             |              | 3.63±0      |              |               |              |
| 2626-6-08-0   | 5366021   |               |              |              |               |              |              |             |              |               |              |             |              |             | 2.61±0       |               |              |
| 591-49-1      | 11574     |               |              |              |               |              |              |             |              |               |              |             |              |             |              | 4.02±0        |              |
| 5409-55-2     | 76420     | 13.37±3.27    | 17.38±5.57   | 10.93±0.72   | 20.58±6.25    | 17.71±3.82   | 13.65±1.51   | 14.46±0.38  | 10.72±2.19   | 14.85±1.01    | 9.91±3.10    | 5.14±0      | 10.67±1.96   | 6.70±0.42   | 12.29±4.20   | 9.35±1.05     | 18.77±0.77   |
| 3828-4-27-4   | 5352876   | 5.74±1.04     | 9.05±4.10    |              |               |              |              |             |              |               |              |             |              |             |              |               |              |
| 2076-69-70-3  | 543411    |               |              |              |               |              |              |             |              |               |              |             |              |             |              |               | 3.77±0       |
| 7757-3-35-4   | 101288159 |               |              |              |               |              |              |             |              |               |              |             | 9.56±0       |             | 29.91±0      |               |              |
| 1000-349-85-9 | 3065113   | 276.73±152.22 | 197.24±75.85 | 154.33±34.09 | 380.61±190.41 | 201.72±25.25 | 157.22±12.70 | 142.12±8.21 | 138.74±15.26 | 282.27±121.41 | 164.17±42.18 | 55.96±14.98 | 155.78±30.45 | 126.23±5.01 | 213.20±78.31 | 344.70±196.38 | 232.14±33.82 |

[illegible]

[illegible]

[illegible]

|          |         |            |             |            |             |            |            |            |            |            |            |           |            |            |           |            |            |
|----------|---------|------------|-------------|------------|-------------|------------|------------|------------|------------|------------|------------|-----------|------------|------------|-----------|------------|------------|
| 2091     | 528274  | 118.28     | 52.92±      | 55.10±     | 112.73      |            | 37.21±     |            | 45.34±     | 70.43±     |            | 37.5      | 87.91±16   | 35.6       | 153.90±0  |            |            |
| -29-4    | 5       | ±0         | 19.33       | 1.68       | ±0          |            | 0          |            | 12.84      | 0          | 7.86±0     | 0±0       | .67        | 3±0        |           |            |            |
| 2025     | 111625  |            |             |            |             |            | 19.65±     |            | 4.78±      | 36.25±     | 14.31±     | 18.6      |            | 29.2       |           |            |            |
| 7-75-4   | 21      | 8.12±0     | 4.33±0      |            |             |            | 2.89       | 7.59±0     | 0          | 0          | 0          | 5.28±0    | 1±2.53     | 30.44±6.28 | 5±3.44    |            |            |
| 1000     |         |            |             |            |             |            |            |            |            |            |            |           |            |            |           |            |            |
| 192-71-8 | 495454  | 5.62±0     | 5.17±0      | 11.36±1.86 | 52.03±0     |            | 21.74±0    | 6.68±0     |            | 53.47±0    |            |           |            |            |           |            |            |
| 1000     | 536589  |            |             |            |             |            |            |            |            |            |            |           |            |            |           |            |            |
| 195-87-5 | 2       |            |             | 8.08±0     |             |            |            |            |            |            |            |           |            |            |           |            |            |
| 506-12-7 | 10465   |            |             |            | 4.19±0      |            |            |            |            |            |            |           |            |            |           |            |            |
| 506-32-1 | 444899  |            |             |            |             |            | 23.42±0    |            |            |            |            |           |            |            |           |            |            |
| 1773     |         |            |             |            |             |            |            |            |            |            |            |           |            |            |           |            |            |
| 5-94-3   | 5312518 |            |             |            |             |            |            |            |            | 44.90±0    |            |           |            |            |           |            |            |
| 100-52-7 | 240     | 32.60±8.93 | 39.43±13.75 | 28.41±6.10 | 55.00±27.86 | 22.44±4.71 | 19.11±0.80 | 16.55±1.07 | 11.74±1.42 | 24.19±7.48 | 12.96±2.17 | 6.73±0.35 | 15.65±2.93 | 18.36±3.28 | 10.92±0   | 14.83±0.16 | 16.25±2.45 |
| 122-78-1 | 998     |            |             |            | 4.89±1.40   |            |            |            |            |            |            |           |            |            | 5.31±1.98 |            | 3.98±0     |
| 5682     | 536566  |            |             |            |             |            |            |            |            |            |            |           |            |            |           |            |            |
| 9-23-3   | 5       | 4.77±0     | 11.60±4.67  | 10.07±0    | 12.35±0     | 7.52±1.30  | 8.63±0     | 5.98±0.62  | 3.46±0     |            | 4.14±0.38  |           |            |            |           |            |            |



[illegible]

[illegible]

[illegible]



|       |        |        |        |        |        |        |        |       |        |        |           |      |         |      |         |        |  |
|-------|--------|--------|--------|--------|--------|--------|--------|-------|--------|--------|-----------|------|---------|------|---------|--------|--|
| 2716  | 536483 |        |        |        |        |        |        | 15.86 |        |        |           | 6.40 |         |      |         |        |  |
| -53-2 | 3      |        |        |        |        |        |        | ±0    |        |        | 13.51±0   | ±0   |         |      | 56.51±0 |        |  |
| 7633  |        |        |        |        |        |        |        |       |        |        |           |      |         | 72.2 |         |        |  |
| 7-16- | 637195 | 20.16± |        |        |        | 58.13± | 17.99± |       |        |        | 4.45±0    | 17.7 | 18.17±0 | 3±24 | 34.85±0 | 37.74± |  |
| 1     |        | 0      |        |        |        | 46.60  | 0      |       |        |        |           | 1±0  |         | .18  |         | 0      |  |
| 1023  |        |        |        |        |        |        |        |       |        |        |           |      |         |      |         |        |  |
| 6-16- | 637195 | 24.66± | 19.91± | 12.59± | 30.31± | 44.00± | 13.78± | 37.53 | 19.57± | 37.48± | 49.10±22. | 31.0 | 38.94±0 |      |         |        |  |
| 5     |        | 0      | 11.33  | 7.74   | 8.79   | 0      | 3.55   | ±0    | 5.19   | 12.21  | 47        | 1±0  |         |      |         |        |  |
| 628-  |        |        |        |        |        |        |        |       |        |        |           |      |         |      |         |        |  |
| 97-7  | 12366  | 22.34± | 13.77± | 9.23±4 | 24.88± |        | 15.17± | 29.26 | 41.99± |        |           |      |         |      |         |        |  |
|       |        | 9.61   | 5.21   | .13    | 5.40   |        | 3.50   | ±13.5 | 0      |        |           |      |         |      |         |        |  |
|       |        |        |        |        |        |        |        | 2     |        |        |           |      |         |      |         |        |  |
| 5572  |        |        |        |        |        |        |        |       |        |        |           |      |         |      |         |        |  |
| 4-48- | 101287 |        |        |        |        |        |        |       |        |        |           |      |         |      |         |        |  |
| 6     | 780    |        |        |        |        |        |        |       |        |        | 42.93±0   |      | 8.56±0  |      |         |        |  |
| 2847  |        |        |        |        |        |        |        |       |        |        |           |      |         |      |         |        |  |
| 4-90- | 168814 |        |        |        |        |        |        |       |        |        |           | 7.93 |         |      | 19.38±0 |        |  |
| 0     |        |        |        |        |        |        |        |       |        |        |           | ±0   |         |      |         |        |  |
| 7750  |        |        |        |        |        |        |        |       |        |        |           |      |         |      |         |        |  |
| 8-64- | 101280 |        |        |        |        |        |        |       |        |        |           |      |         |      |         |        |  |
| 6     | 823    |        |        | 3.03±0 |        |        |        |       |        |        |           |      |         |      |         |        |  |
| 1000  |        |        |        |        |        |        |        |       |        |        |           |      |         |      |         |        |  |
| 131-  | 536363 |        |        |        | 10.04± |        | 19.04± |       |        |        |           | 7.83 |         |      |         | 111.7  |  |
| 33-2  | 3      |        |        |        | 0      |        | 0      |       |        | 8.49±0 |           | ±0   |         |      |         | 4±0    |  |
| 1000  |        |        |        |        |        |        |        |       |        |        |           |      |         |      |         |        |  |
| 330-  | 546149 |        |        |        |        |        |        |       |        |        |           | 3.52 |         |      |         |        |  |
| 54-1  | 2      |        |        |        |        |        |        |       |        |        |           | ±0   |         |      |         |        |  |

[illegible]

[illegible]

[illegible]



[illegible]

|       |        |         |        |        |        |        |       |         |        |        |      |       |  |
|-------|--------|---------|--------|--------|--------|--------|-------|---------|--------|--------|------|-------|--|
| 1000  | 530677 |         |        |        |        |        |       |         |        |        |      |       |  |
| 337-  | 3      |         |        | 4.18±0 |        |        |       |         |        |        |      |       |  |
| 58-3  |        |         |        |        |        |        |       |         |        |        |      |       |  |
| 140-  | 8794   |         |        |        |        |        |       |         |        |        |      | 4.09± |  |
| 29-4  |        |         |        |        |        |        |       |         |        |        |      | 0     |  |
| 5406  |        |         |        |        |        |        |       |         |        |        |      |       |  |
| 0-30- | 104682 | 7.78±2. | 10.32± | 8.29±0 | 5.07±0 | 4.09±0 | 6.17± | 4.20±1. | 6.84±0 | 9.55±0 | 1.37 |       |  |
| 9     |        | 96      | 4.40   |        |        |        | 0     | 03      |        |        | ±0   |       |  |

---

Table S2 The results of the significant correlation coefficient  
between freshness indexes and VOCs  
(Domestic fishmeal)

| Domestic fishmeal |               |                                          |          |         |             |
|-------------------|---------------|------------------------------------------|----------|---------|-------------|
| CAS               | Compounds CID | Correlation coefficient and significance |          |         |             |
|                   |               | AV                                       | pH value | VBN     | Mold counts |
| 128-37-0          | 31404         | 0.660**                                  | 0.477    | 0.392   | 0.427       |
| 91-53-2           | 3293          | 0.292                                    | 0.524*   | -0.139  | -0.165      |
| 500-66-3          | 10377         | 0.552*                                   | 0.342    | 0.594*  | 0.714**     |
| 1008-88-4         | 13886         | 0.651**                                  | 0.417    | 0.624** | 0.653**     |
| 90-12-0           | 7002          | 0.401                                    | 0.529*   | 0.477   | 0.542*      |
| 95-20-5           | 7224          | 0.559                                    | 0.804    | 0.691   | 0.941*      |
| 13067-27-1        | 83101         | 0.990*                                   | -0.231   | 0.736   | 0.445       |
| 4466-24-4         | 20534         | 0.006                                    | 0.277    | -0.887* | -0.044      |
| 57-10-3           | 985           | 0.680**                                  | 0.680**  | 0.596*  | 0.623**     |
| 373-49-9          | 445638        | 0.568*                                   | 0.568*   | 0.639** | 0.708**     |
| 544-63-8          | 11005         | 0.697**                                  | 0.697**  | 0.499*  | 0.580*      |
| 1002-84-2         | 13849         | 0.558*                                   | 0.558*   | 0.310   | 0.370       |
| 6217-54-5         | 445580        | 0.681**                                  | 0.681**  | 0.364   | 0.410       |
| 57-11-4           | 5281          | 0.709                                    | 0.709    | -0.854  | 0.986*      |
| 5409-55-2         | 76420         | 0.558*                                   | 0.426    | 0.577*  | 0.509       |
| 10396-80-2        | 146102        | 0.643**                                  | 0.438    | 0.350   | 0.418       |
| 2437-62-9         | 270491        | 0.721**                                  | 0.559*   | 0.316   | 0.339       |
| 52978-85-5        | 579763        | 0.483                                    | 0.364    | 0.502*  | 0.499*      |
| 93-55-0           | 7148          | 0.600                                    | 0.368    | 0.958** | 0.855       |
| 1000155-88-8      | 556457        | -0.868                                   | 1.000**  | -0.270  | 0.459       |
| 122-78-1          | 998           | 0.580*                                   | -0.129   | 0.505   | 0.387       |
| 56829-23-3        | 5365665       | 0.239                                    | -0.630*  | 0.641*  | 0.452       |
| 124-19-6          | 31289         | 0.689                                    | -0.996   | 0.992   | 1.000**     |
| 931-96-4          | 565407        | 0.397                                    | -0.262   | 0.647*  | 0.504       |
| 85896-31-7        | 522841        | 0.957*                                   | 0.609    | -0.576  | -0.319      |
| 30361-28-5        | 5283329       | 0.556                                    | 0.940**  | 0.515   | 0.437       |
| 131-11-3          | 8554          | 0.617*                                   | 0.469    | 0.736** | 0.689**     |
| 2716-53-2         | 5364833       | 0.630                                    | 0.843**  | 0.559   | 0.616       |
| 1499-53-2         | 226558        | 0.721                                    | 0.980    | 1.000*  | 0.936       |
| 10236-16-5        | 637195        | 0.685**                                  | 0.293    | 0.553*  | 0.523*      |
| 628-97-7          | 12366         | 0.542*                                   | 0.291    | 0.436   | 0.375       |
| 5487-50-3         | 554151        | 0.927*                                   | 0.484    | 0.571   | 0.622       |
| 18240-10-3        | 86682         | -0.152                                   | -0.812*  | 0.397   | -0.044      |
| 22117-09-5        | 5367371       | 0.942**                                  | 0.451    | 0.699*  | 0.776*      |
| 655-48-1          | 95447         | -0.270                                   | -0.253   | -0.999* | -0.987      |

|              |         |         |          |         |         |
|--------------|---------|---------|----------|---------|---------|
| 593-45-3     | 11635   | 0.532*  | 0.301    | 0.079   | 0.079   |
| 629-99-2     | 12406   | 0.761** | 0.427    | 0.324   | 0.395   |
| 55282-12-7   | 292285  | -0.126  | -0.798** | 0.539   | 0.388   |
| 629-92-5     | 12401   | 0.559   | 0.579    | 0.771*  | 0.679   |
| 7390-81-0    | 23872   | 0.783*  | 0.558    | 0.758*  | 0.704   |
| 18435-45-5   | 29075   | 0.121   | 0.598*   | 0.027   | 0.308   |
| 33156-93-3   | 6440990 | 0.607*  | 0.532*   | 0.464   | 0.556*  |
| 1000150-40-3 | 5367478 | 0.620*  | 0.221    | 0.359   | 0.377   |
| 56134-03-3   | 5352709 | 0.998*  | 0.999*   | 0.176   | 0.053   |
| 631-61-8     | 517165  | 0.736   | 0.208    | 0.882*  | 0.925** |
| 75-50-3      | 1146    | -0.079  | -0.022   | 0.831*  | -0.647  |
| 296245-21-1  | 581431  | 0.459   | 0.144    | 0.635*  | 0.719** |
| 1000303-08-5 | 6422106 | -0.623  | 0.433    | -0.999* | -0.995  |

Imported fishmeal

| CAS          | Compounds CID | Correlation coefficient and significance |          |         |             |
|--------------|---------------|------------------------------------------|----------|---------|-------------|
|              |               | AV                                       | pH value | VBN     | Mold counts |
| 91-20-3      | 931           | 0.073                                    | 0.594*   | 0.573*  | 0.376       |
| 93008-87-8   | 617681        | 0.349                                    | 0.897**  | 0.753** | 0.688**     |
| 91-57-6      | 7055          | 0.379                                    | 0.655*   | 0.580*  | 0.624*      |
| 65539-79-9   | 5374980       | 0.713*                                   | 0.191    | -0.240  | 0.187       |
| 500-66-3     | 10377         | 0.200                                    | 0.815**  | 0.905** | 0.339       |
| 3208-16-0    | 18554         | -0.673*                                  | -0.036   | 0.122   | -0.497      |
| 84679-58-3   | 614550        | 0.303                                    | -0.022   | 0.023   | -0.813*     |
| 151-10-0     | 9025          | 0.757                                    | 0.780    | 0.758   | 0.865*      |
| 1008-88-4    | 13886         | 0.653                                    | 0.955**  | 0.958** | 0.585       |
| 52823-95-7   | 301207        | 0.894                                    | 0.921    | -0.982  | 0.998*      |
| 57-10-3      | 985           | 0.201                                    | 0.819**  | 0.730** | 0.488       |
| 544-63-8     | 11005         | 0.373                                    | 0.857**  | 0.808** | 0.517*      |
| 112-80-1     | 445639        | -0.068                                   | 0.632*   | 0.583*  | 0.309       |
| 1002-84-2    | 13849         | 0.294                                    | 0.533*   | 0.494   | 0.222       |
| 373-49-9     | 445638        | 0.214                                    | 0.832*   | 0.830*  | 0.568       |
| 100-52-7     | 240           | -0.761**                                 | -0.348   | -0.086  | -0.639**    |
| 638-66-4     | 12533         | 0.277                                    | 0.871**  | 0.808** | 0.487       |
| 2566-90-7    | 6421262       | 0.244                                    | 0.900**  | 0.582*  | 0.536*      |
| 1000131-33-2 | 5363633       | 0.626                                    | 0.993**  | 0.969** | 0.580       |
| 2716-53-2    | 5364833       | 0.180                                    | 0.953*   | 0.985*  | 0.405       |
| 1000222-86-6 | 9602988       | 0.344                                    | 0.547*   | 0.508   | 0.526       |
| 82304-66-3   | 545303        | 0.378                                    | 0.922**  | 0.888** | 0.683*      |
| 29204-24-8   | 76099200      | 0.278                                    | 0.832*   | 0.826*  | 0.716       |
| 629-78-7     | 12398         | 0.663**                                  | 0.616*   | 0.374   | 0.486       |
| 1000190-92-9 | 601922        | 0.447                                    | 0.385    | -0.511  | 0.756*      |
| 55000-52-7   | 41282         | 0.298                                    | -0.483   | -0.820* | -0.507      |
| 7390-81-0    | 23872         | 0.406                                    | 0.740**  | 0.678*  | 0.521       |
| 56554-77-9   | 557439        | 0.333                                    | 0.932**  | 0.820** | 0.333       |

|             |        |         |         |         |        |
|-------------|--------|---------|---------|---------|--------|
| 137235-42-8 | 595401 | -0.997* | -0.368  | 0.868   | -0.542 |
| 18435-45-5  | 29075  | 0.959   | 0.808   | -1.000* | 0.691  |
| 54060-30-9  | 104682 | -0.620  | -0.731* | 0.419   | -0.364 |

---

Note:\*\*extremely significant difference,  $P<0.01$ ; \* significant difference,  $0.01<P<0.05$ .
